# Supplementary material for: Assessment of renal glomerulosclerosis and thickness of the carotid intima-media complex as a means of age estimation in Western European bodies
Source: Springer Nature journal article supplement (doi:10.1007/s00414-021-02705-w), 2021-11-13

**ESM 1** Sketch of the harvest site for the evaluated common carotid artery segment

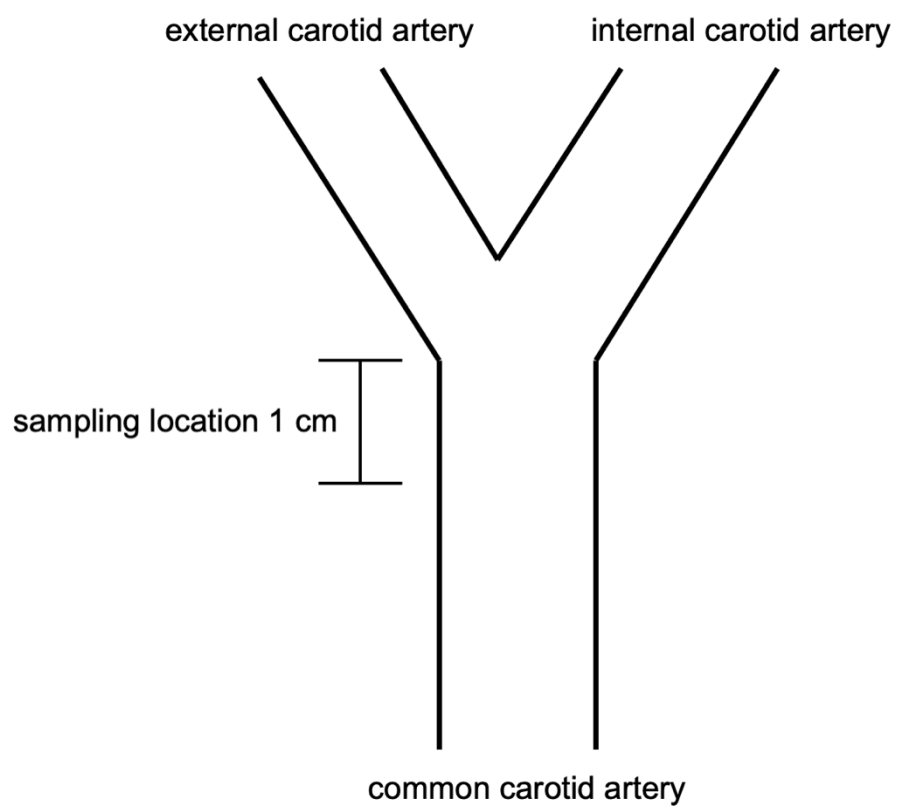

Supplement: MOESM1 [file 414_2021_2705_MOESM1_ESM.pdf]
