# Supplementary material for: Assessment of renal glomerulosclerosis and thickness of the carotid intima-media complex as a means of age estimation in Western European bodies
Source: Springer Nature journal article supplement (doi:10.1007/s00414-021-02705-w), 2021-11-13
Supplement: MOESM2 [file 414_2021_2705_MOESM2_ESM.pdf]

**ESM 2** Classification of renal glomerulosclerosis The tables show the classification results for the kidney samples sorted by sex and body side

| Selection:                                                               |         | Predicted group membership          |          |           |       |       |
|--------------------------------------------------------------------------|---------|-------------------------------------|----------|-----------|-------|-------|
| Left side, female                                                        |         | (in percent of sclerotic glomeruli) |          |           |       |       |
|                                                                          |         | No sclerosis                        | >0% - 5% | >5% - 10% | > 10% | Total |
| True group membership<br>(Age in years)                                  | 21 - 35 | 2                                   | 4        | 0         | 0     | 6     |
|                                                                          | 36 - 50 | 6                                   | 10       | 0         | 1     | 17    |
|                                                                          | 51 - 65 | 1                                   | 9        | 1         | 0     | 11    |
|                                                                          | > 65    | 0                                   | 7        | 5         | 7     | 19    |
| Result: 37.7% of the originally grouped cases were classified correctly. |         |                                     |          |           |       |       |

**a** Classification of renal glomerulosclerosis: left side, female

| Selection:                                                               |         | Predicted group membership          |          |           |       |       |
|--------------------------------------------------------------------------|---------|-------------------------------------|----------|-----------|-------|-------|
| Left side, male                                                          |         | (in percent of sclerotic glomeruli) |          |           |       |       |
|                                                                          |         | No sclerosis                        | >0% - 5% | >5% - 10% | > 10% | Total |
| True group membership<br>(Age in years)                                  | 21 - 35 | 24                                  | 6        | 0         | 0     | 30    |
|                                                                          | 36 - 50 | 6                                   | 18       | 1         | 0     | 25    |
|                                                                          | 51 - 65 | 2                                   | 23       | 10        | 1     | 36    |
|                                                                          | > 65    | 0                                   | 18       | 17        | 4     | 39    |
| Result: 43.1% of the originally grouped cases were classified correctly. |         |                                     |          |           |       |       |

**b** Classification of renal glomerulosclerosis: left side, male

| Selection:                                                               |         | Predicted group membership          |          |           |       |       |
|--------------------------------------------------------------------------|---------|-------------------------------------|----------|-----------|-------|-------|
| Right side, female                                                       |         | (in percent of sclerotic glomeruli) |          |           |       |       |
|                                                                          |         | No sclerosis                        | >0% - 5% | >5% - 10% | > 10% | Total |
| True group membership<br>(Age in years)                                  | 21 - 35 | 3                                   | 3        | 0         | 0     | 6     |
|                                                                          | 36 - 50 | 6                                   | 10       | 0         | 1     | 17    |
|                                                                          | 51 - 65 | 1                                   | 7        | 2         | 1     | 11    |
|                                                                          | > 65    | 2                                   | 6        | 6         | 5     | 19    |
| Result: 37.7% of the originally grouped cases were classified correctly. |         |                                     |          |           |       |       |

**c** Classification of renal glomerulosclerosis: right side, female

| selection:                                                               |         | Predicted group membership          |          |           |       |       |
|--------------------------------------------------------------------------|---------|-------------------------------------|----------|-----------|-------|-------|
| Right side, male                                                         |         | (in percent of sclerotic glomeruli) |          |           |       |       |
|                                                                          |         | No sclerosis                        | >0% - 5% | >5% - 10% | > 10% | Total |
| True group membership<br>(Age in years)                                  | 21 - 35 | 22                                  | 8        | 0         | 0     | 30    |
|                                                                          | 36 - 50 | 7                                   | 17       | 2         | 0     | 25    |
|                                                                          | 51 - 65 | 2                                   | 24       | 8         | 2     | 36    |
|                                                                          | > 65    | 1                                   | 18       | 14        | 6     | 39    |
| Result: 40.8% of the originally grouped cases were classified correctly. |         |                                     |          |           |       |       |

**d** Classification of renal glomerulosclerosis: right side, male
